# Supplementary material
Source: Springer Nature journal article supplement (https://www.springermedizin.de/resource/supplementary/12985_2007_297_MOESM4_ESM.pdf/9607734)

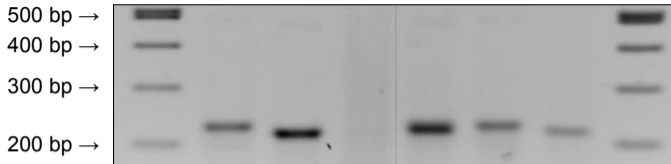

M            1            2            3            4            5            6            M

Sample number

#2290

#4123

LNA-PtroLCV1

-    +    +    -    -    +

LNA-PtroRHV1

-    -    +    -    +    +

LCV-1

RHV-1

RHV-1

LCV-1

negative

RHV-2

Supplement: MOESM4 [file 9607734]
